# Supplementary material
Source: PubMed Central journal article supplement (PMC3761296)
Supplement: 77d43075fb693e7a4668439aad63450b_genetics.113.153544-8.pdf [file 77d43075fb693e7a4668439aad63450b_genetics.113.153544-8.pdf]

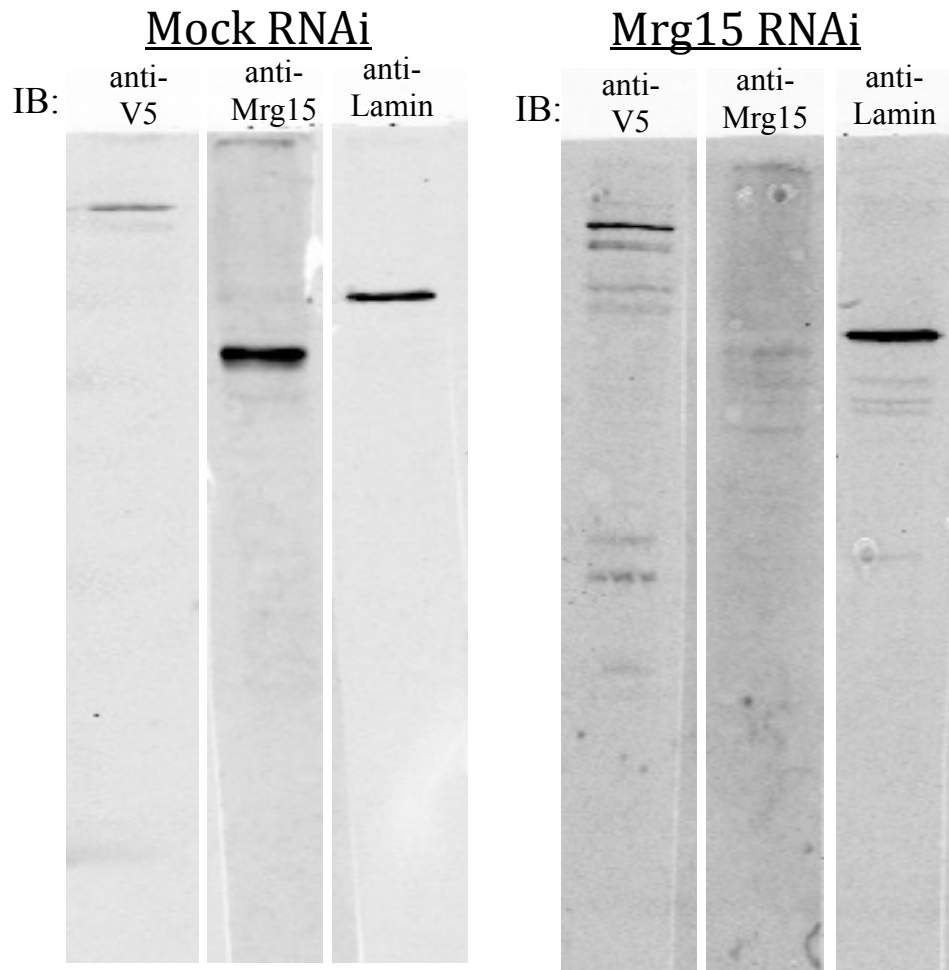

**Figure S5** RNAi depletion of Mrg15 protein in S2 cultured cells. Cells were transfected with pMT-Cap-H2-V5 (or Cap-H2-EGFP; only V5 shown here) and were treated with double stranded RNA to pBlueScript SK (control Mock RNAi) or to Mrg15. Whole cell lysates were used for immunoblots (IB) with anti-V5, anti-Mrg15 or anti-Lamin (Dm0, Lamin B). Approximately >75% of Mrg15 protein was observed to be consistently depleted over four biological replicates. Protein depletion was determined from immunoblots exposed to film, scanned and quantitated using ImageJ. Lamin Dm0 bands in the linear range were used as loading controls.
