# Supplementary material
Source: PubMed Central journal article supplement (PMC3761296)
Supplement: 2700fbed068b0765f071465869f9e8c6_genetics.113.153544-10.pdf [file 2700fbed068b0765f071465869f9e8c6_genetics.113.153544-10.pdf]

**Table S3 Figure S2 supporting information.** “Abbr” denotes abbreviation of genotype used in supplemental Figure S2. List of genotypes, number (n) of nurse cells for each of the three FISH probes, and p-values for supplemental Figure S2. The *Smc4* allele is *SMC4<sup>k08819</sup>* and the *Cap-H2* allele is *Cap-H2<sup>Z3-0019</sup>*. The p-value is a two-tailed student T-test in Microsoft Excel and relative to the OrR-S. “nd” denotes not done.

| Abbr.   | Genotype                                            | T-test to<br>Genotype | Cap-H2   |          |          |          |          |             |
|---------|-----------------------------------------------------|-----------------------|----------|----------|----------|----------|----------|-------------|
|         |                                                     |                       | Ubx FISH | 34D FISH | FISH     | n of Ubx | n of 34D | n of Cap-H2 |
| Tip60G  | SMC4/+;Cap-H2/reptin <sup>P</sup> {PZ}06945         | SMC4/+;Cap-H2/+       | 2.07E-15 | 1.88E-20 | 3.10E-07 | 125      | 37       | 115         |
|         | SMC4/+;Cap-H2/reptin <sup>P</sup> bac{WH}f01801     |                       | 9.99E-08 | 2.66E-14 | 2.63E-08 | 77       | 59       | 63          |
|         | SMC4/+;Cap-H2/Mrg15 <sup>Δj6A3</sup>                |                       | 1.58E-12 | 3.72E-08 | 3.92E-13 | 124      | 19       | 83          |
|         | Tip60 <sup>ΔP</sup> {Mae-UAS.6.11}GG01739/+;        |                       |          |          |          |          |          |             |
| Tip60E  | SMC4/+;Cap-H2/+                                     |                       | 2.13E-12 | 5.21E-03 | 1.80E-06 | 75       | 49       | 79          |
| Tip60E  | Tip60 <sup>ΔP</sup> bac{RB}e02395/+;SMC4/+;Cap-H2/+ |                       | 4.01E-01 | 1.63E-01 | 8.37E-01 | 89       | 55       | 92          |
|         | Tip60G/Tip60E; SMC4/+; Cap-H2/+                     |                       | 7.01E-28 | 2.43E-09 | nd       | 89       | 81       | nd          |
|         | SMC4/+;Cap-H2/+                                     | OrR-S                 | 9.36E-53 | 3.93E-26 | 1.34E-32 | 59       | 61       | 74          |
|         | reptin <sup>P</sup> {PZ}06945/+                     |                       | 1.64E-04 | 2.13E-05 | 1.28E-02 | 86       | 72       | 63          |
| Mrg15Df | reptin <sup>P</sup> bac{WH}f01801/+                 |                       | 4.76E-01 | 1.64E-01 | 7.49E-02 | 63       | 48       | 68          |
|         | Df(3R)BSC741/+                                      |                       | 2.06E-08 | 5.51E-01 | 5.88E-08 | 63       | 59       | 58          |
|         | Tip60G/Tip60E                                       |                       | 3.49E-07 | 2.11E-10 | 1.46E-08 | 79       | 57       | 86          |
| wt      | OrR-S                                               |                       |          |          |          | 101      | 86       | 82          |
