# Supplementary material
Source: PubMed Central journal article supplement (PMC3761296)
Supplement: 622870006653990dac3a73a9167fcae0_genetics.113.153544-6.pdf [file 622870006653990dac3a73a9167fcae0_genetics.113.153544-6.pdf]

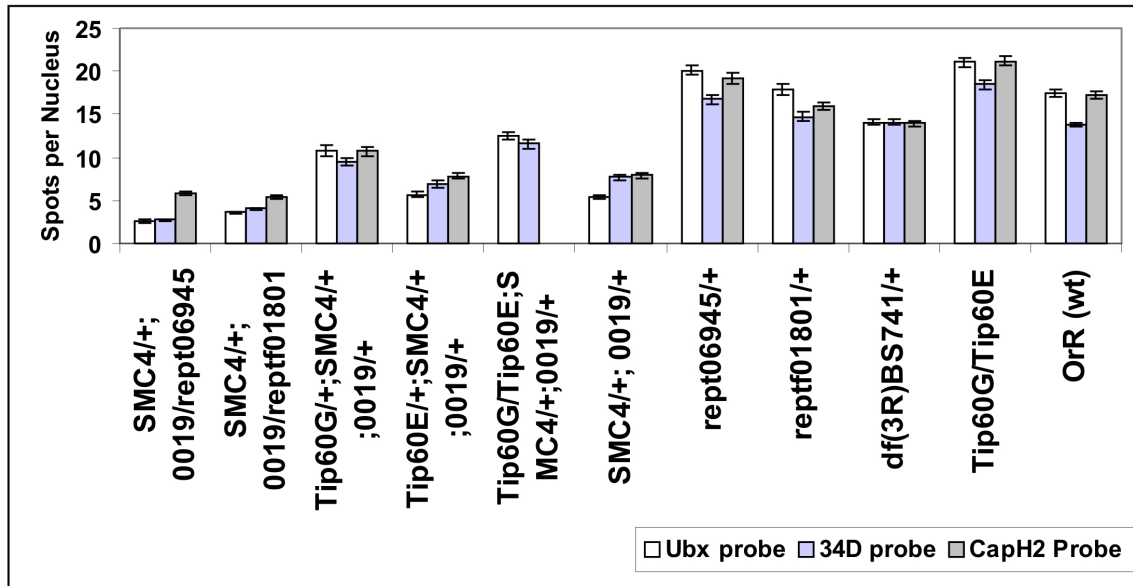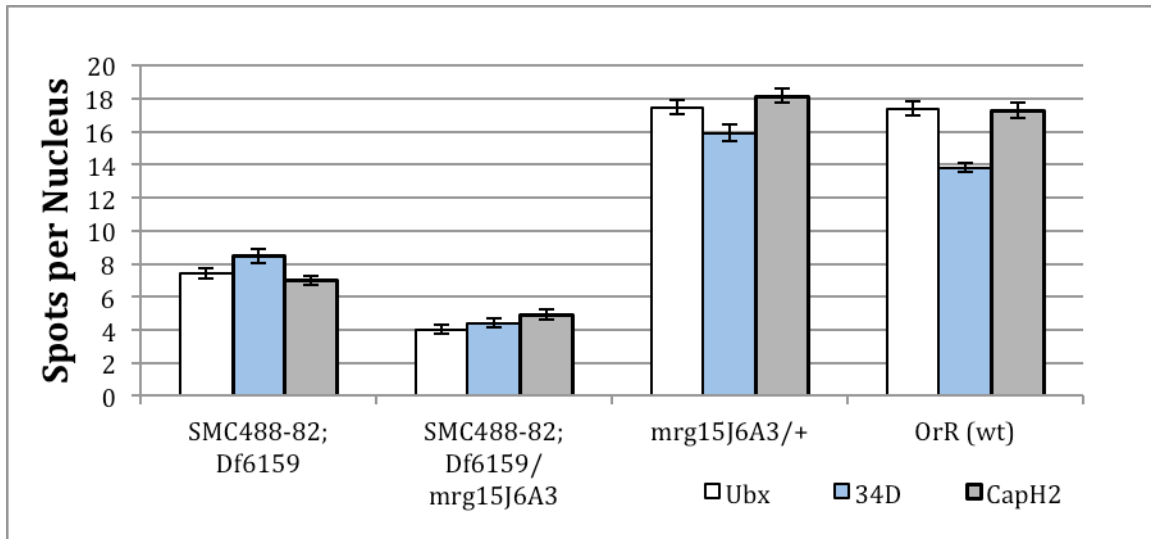

**FigureS2** Condensin II interactors in the ovarian nurse cells. The graphs shows the number of FISH spots per nucleus in stage 6/7 eggchambers for each of the genotypes listed on the x-axis. The white bar represents the Ubx genomic region FISH probe, light blue is the 34D genomic region FISH probe, and grey is the Cap-H2 genomic region FISH probe. 0019 denotes the allelic designations for *Cap-H2*<sup>Z3-0019</sup>. The *SMC4* allele used in the top graph is *Smc4*<sup>k08819</sup> and for the bottom graph *Smc4*<sup>68-82</sup>. The deficiency uncovering the *Mrg15* locus is Df(3R)BSC741. The deficiency uncovering the Cap-H2 locus is Df(3R)Exel6159 abbreviated as "Df6159". The list of complete genotypes is found in supplemental Table S2 along with the number of nurse cells for each probe and p-values.
