# Supplementary material
Source: PubMed Central journal article supplement (PMC3761296)
Supplement: b11a71e04bc3b11781aee765f5775031_genetics.113.153544-2.pdf [file b11a71e04bc3b11781aee765f5775031_genetics.113.153544-2.pdf]

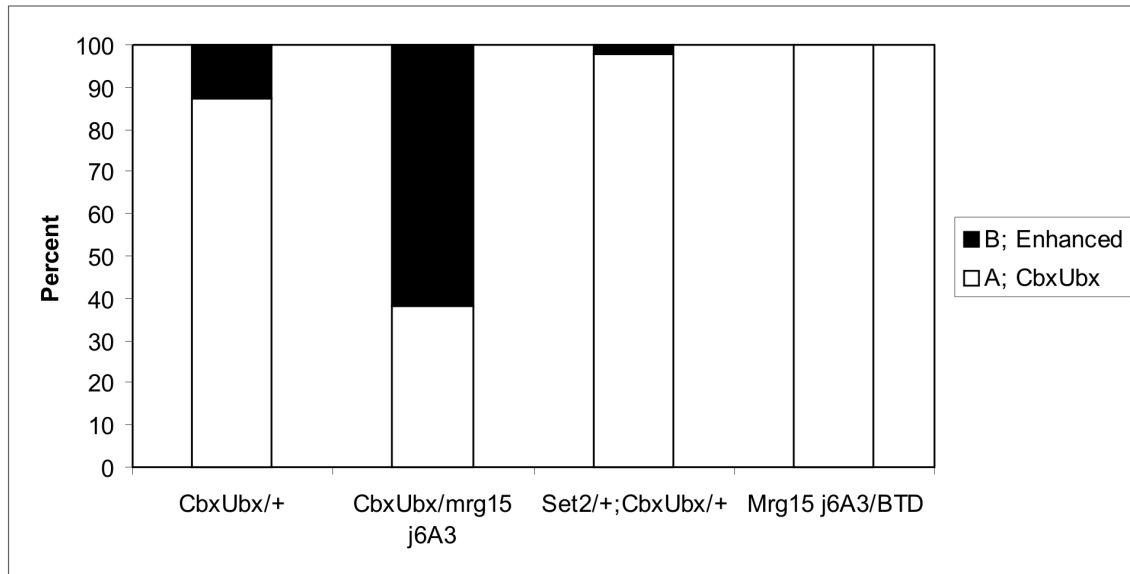

**FigureS4** Transvection in *Mrg15*. Wings from the genotypes shown on x-axis were scored as either typical *Ubx<sup>Cbx-1</sup>Ubx<sup>1</sup>* (class A, white bar) or enhanced (class B, black bar). Note that "typical" class A wings are not wild type and instead have a moderate abnormal morphology as a result of the transvecting *Ubx<sup>Cbx-1</sup>* allele. See Figure 7 of main text for images of typical wings. For simplicity, *Ubx<sup>Cbx-1</sup>Ubx<sup>1</sup>* is denoted above as "CbxUbx". The data presented in this Figure S4 for *Mrg15<sup>j6A3</sup>* was derived independently of the data in Figure 7 of the main text. As an additional control, the *Set2<sup>1</sup>/+* mutation has no significant effect on this transvection system. The last genotype includes the bithorax transvection disruptor (BTD), which is a rearrangement of the *Ubx<sup>Cbx-1</sup>Ubx<sup>1</sup>* chromosome. N>61 for all genotypes. P-values using chi-squared relative to *Ubx<sup>Cbx-1</sup>Ubx<sup>1</sup>/++* enhanced class: *Mrg15<sup>j6A3</sup>* p<0.001, *Set2<sup>1</sup>* p=0.74, *Mrg15<sup>j6A3</sup>/BTD* p<0.005. The *Set2<sup>1</sup>* mutation has no significant affect on transvection in this assay and serves as a negative control. Note that since only one *Set2* mutant allele was tested we cannot exclude the possibility that other *Set2* mutations may modify transvecting loci.
