# Supplementary material
Source: PubMed Central journal article supplement (PMC3761296)
Supplement: c38e42fceadbce69111246ecfaf497da_genetics.113.153544-7.pdf [file c38e42fceadbce69111246ecfaf497da_genetics.113.153544-7.pdf]

**Table S1 List of yeast two-hybrid interactors.** The list of clones recovered from the yeast two-hybrid screen. The insert size in base pairs was estimated from PCR products (see main text for methods). The gene descriptor and CG numbers are as given from [www.flybase.org](http://www.flybase.org) based on blast search results from sequenced clones.

| clone #   | size of insert | gene descriptor                                                                   | CG-identifier |
|-----------|----------------|-----------------------------------------------------------------------------------|---------------|
| 1CH2-64-1 | 1000           | unknown (eIF-3-p25 domain, Eukaryotic translation initiation factor 3 subunit 12) | CG10306       |
| 1CH2-39   | 500            | unknown (methyltransferase-like protein)                                          | CG10584       |
| 1CH2-65   | 400            | Programmed cell death 4 ortholog (Pdcd4)                                          | CG10990       |
| 1CH2-83-3 | 200            | RpS12                                                                             | CG11271       |
| 1CH2-76-3 | 250            | RpS12                                                                             | CG11271       |
| 1CH2-4    | 1100           | Mitochondrial ribosomal protein S22                                               | CG12261       |
| 1CH2-21   | 200            | Pleckstrin-like protein (PH domain-containing)                                    | CG12393       |
| 1CH2-32   | 300            | Ribosomal protein L8                                                              | CG1263        |
| 1CH2-54-1 | 900            | beta-site APP-cleaving enzyme                                                     | CG13095       |
| 1CH2-7-1  | 1000           | yellow-g2, yellow protein (contain MRJP domain)                                   | CG13804       |
| 1CH2-68   | 900            | Chorion protein a at 7F                                                           | CG33962       |
| 1CH2-83-1 | 900            | lethal (3) 03670 (unknown function)                                               | CG1715        |
| 1CH2-51-4 | 180            | RpL5                                                                              | CG17489       |
| 1CH2-14   | 360            | Glutathione S transferase E6                                                      | CG17530       |
| 1CH2-1    | 360            | Ribosomal protein L31                                                             | CG1821        |
| 1CH2-28   | 400            | Ribosomal protein S7                                                              | CG1883        |
| 1CH2-63-1 | 300            | RpS7                                                                              | CG1883        |
| 1CH2-61   | 800            | Translation elongation factor 2b (Ef2b)                                           | CG2238        |
| 1CH2-77   | 550            | Translation elongation factor 2b                                                  | CG2238        |
| 1CH2-2    | 1000           | Yolk protein 1                                                                    | CG2985        |
| 1CH2-73   | 1350           | Yolk protein 1 (Yp1)                                                              | CG2985        |
| 1CH2-78   | 120            | Yolk protein 1 (Yp1) (same as 1CH2-73)                                            | CG2985        |
| 1CH2-45-1 | 950            | Yolk protein 1                                                                    | CG2985        |
| 1CH2-67-1 | 880            | Yolk protein 1                                                                    | CG2985        |
| 1CH2-58   | 1300           | Yolk protein 1                                                                    | CG2985        |
| 1CH2-72-1 | 900            | Yolk protein 1                                                                    | CG2985        |
| 1CH2-45-2 | 300            | RpL41                                                                             | CG30425       |
| 1CH2-72-3 | 200            | RpL41                                                                             | CG30425       |
| 1CH2-64-2 | 800            | 14-3-3 epsilon (PAR5, EK3-5, 14-3-3)                                              | CG31196       |
| 1CH2-7-2  | 230            | RpL12                                                                             | CG3195        |
| 1CH2-17   | 360            | Pyroglutamyl-peptidase I                                                          | CG32147       |
| 1CH2-80   | 250            | singed, structural constituent of cytoskeleton                                    | CG32858       |
| 1CH2-79-1 | 780            | 26S proteasome regulatory complex subunit p42D (Rpt4)                             | CG3455        |
| 1CH2-53   | 900            | unknown (Xylutokinase activity, FGGY-N and FGGY -C domains)                       | CG3534        |
| 1CH2-60   | 900            | bellwether (blw), mitochondrial ATP synthase subunit alpha precursor              | CG3612        |
| 1CH2-74   | 700            | Mitochondrial ATP synthase alpha subunit                                          | CG3612        |
| 1CH2-34   | 600            | Ribosomal protein L23                                                             | CG3661        |
| 1CH2-19   | 450            | Eukaryotic initiation factor 4E (eIF-4E)                                          | CG4035        |
| 1CH2-54-2 | 500            | RpS16                                                                             | CG4046        |
| 1CH2-26   | 1000           | Unknown                                                                           | CG40460       |
| 1CH2-51-1 | 1150           | Unknown                                                                           | CG40460       |
| 1CH2-18   | 350            | Ribosomal protein L35 RpL35                                                       | CG4111        |
| 1CH2-69   | 300            | Eukaryotic initiation factor 2 (eIF-2 beta)                                       | CG4153        |
| 1CH2-59   | 410            | Heat shock protein hsp26                                                          | CG4183        |

|           |      |                                                           |        |
|-----------|------|-----------------------------------------------------------|--------|
| 1CH2-44   | 200  | SUMO/Ubiquitin-like protein SMT3                          | CG4494 |
| 1CH2-8-2  | 280  | RpLP2                                                     | CG4918 |
| 1CH2-67-2 | 600  | RpS2                                                      | CG5920 |
| 1CH2-37   | 650  | Vacuolar proton-motive ATPase subunit G VHA13             | CG6213 |
| 1CH2-41   | 800  | MRG15                                                     | CG6363 |
| 1CH2-56   | 1400 | MRG15                                                     | CG6363 |
| 1CH2-8-1  | 600  | MRG15                                                     | CG6363 |
| 1CH2-52-2 | 390  | Chorion protein 15                                        | CG6519 |
| 1CH2-27   | 130  | Chorion protein 19                                        | CG6524 |
| 1CH2-66   | 530  | Chorion protein 19                                        | CG6524 |
| 1CH2-51-2 | 310  | RpS25                                                     | CG6684 |
| 1CH2-51-3 | 280  | RpS25                                                     | CG6684 |
| 1CH2-42   | 340  | Unknown (Nuclear phosphoprotein p8)                       | CG6770 |
| 1CH2-72-2 | 500  | Unknown (Nuclear phosphoprotein p8)                       | CG6770 |
| 1CH2-40-2 | 270  | RpS3                                                      | CG6779 |
| 1CH2-5    | 600  | Rack1, Receptor of activated protein kinase C1            | CG7111 |
| 1CH2-15   | 400  | Rack1                                                     | CG7111 |
| 1CH2-24   | 600  | Rack1                                                     | CG7111 |
| 1CH2-49   | 600  | Rack1                                                     | CG7111 |
| 1CH2-71   | 550  | Rack1                                                     | CG7111 |
| 1CH2-40-1 | 450  | Rack1                                                     | CG7111 |
| 1CH2-79-2 | 420  | Rack1                                                     | CG7111 |
| 1CH2-36   | 300  | Ribosomal protein LP0(RpLP0)                              | CG7490 |
| 1CH2-50   | 400  | Ribosomal protein L11 (RpL11)                             | CG7726 |
| 1CH2-43   | 180  | janus A (molecular function unknown, sex differentiation) | CG7933 |
| 1CH2-13   | 510  | Unknown (WD40/YVTN repeat-like-containing domain)         | CG8001 |
| 1CH2-23   | 350  | Cystatin-like protein                                     | CG8050 |
| 1CH2-84   | 160  | Ribosomal protein L37A (RpL37A)                           | CG8527 |
| 1CH2-76-2 | 400  | Jon25Biii (elastase activity, trypsin activity)           | CG8871 |
| 1CH2-12   | 900  | Glyceraldehyde 3 phosphate dehydrogenase 2                | CG8893 |
| 1CH2-83-2 | 510  | Vitelline membrane 26Aa (Vm26Aa)                          | CG9048 |
| 1CH2-11   | 360  | palisade, TU-1 (vitelline membrane formation)             | CG9050 |
| 1CH2-25   | 250  | Vitelline membrane 34Ca (Vm34Ca)                          | CG9271 |
| 1CH2-30   | 900  | Glutathione S-transferase-like protein                    | CG9362 |
| 1CH2-52-1 | 500  | Glycoside hydrolase                                       | CG9466 |
| 1CH2-76-1 | 500  | Int6 (Translation initiation factor activity)             | CG9677 |
| 1CH2-57   | 200  | Unknown                                                   | CG9350 |
| 1CH2-29   | 60   | empty vector                                              |        |
| 1CH2-31   | 70   | empty vector                                              |        |
| 1CH2-81   | 40   | empty vector                                              |        |
| 1CH2-63-2 | 20   | empty vector                                              |        |
