# Supplementary material
Source: PubMed Central journal article supplement (PMC3761296)
Supplement: c4219337e679acdd4191393a812b6ebc_genetics.113.153544-1.pdf [file c4219337e679acdd4191393a812b6ebc_genetics.113.153544-1.pdf]

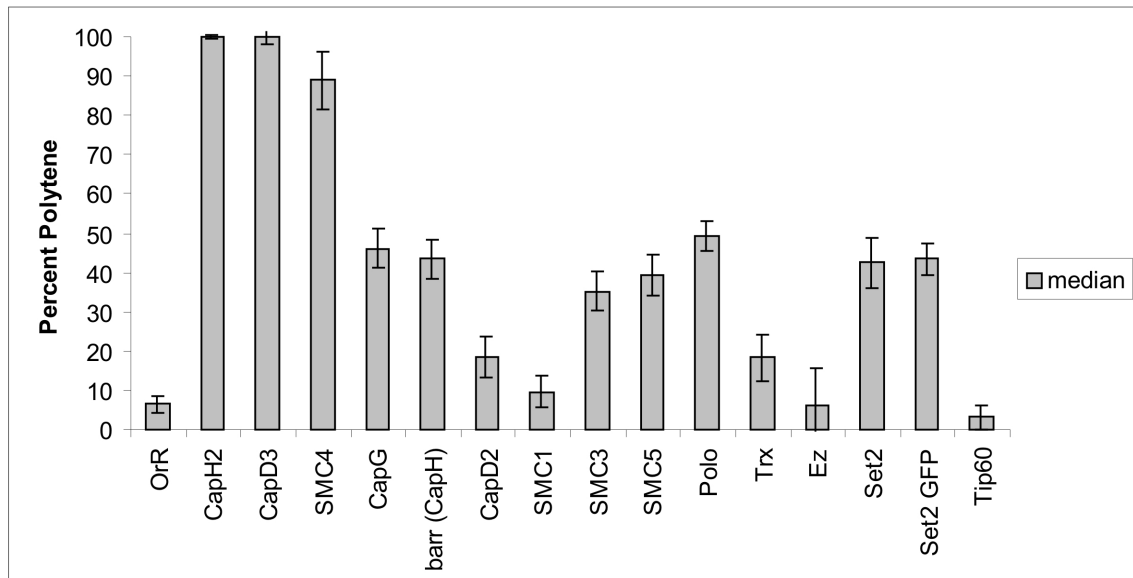

**Figure S1** RNAi suppression in salivary glands overexpressing Cap-H2. The graph represents the median value for the various Vienna RNAi lines crossed into the “spots” genotype (LacO 60F, hs83>LacI-GFP; Hsp70>Gal4, *Cap-H2*<sup>EY09979</sup>), except for the first one, OrR, which is not a RNAi line. The percent polytene was determined by DAPI staining for identification of polytene bands present under 40x magnification. Error bars are shown. See supplemental Table S2 for complete genotype description, number of nuclei and p-values.

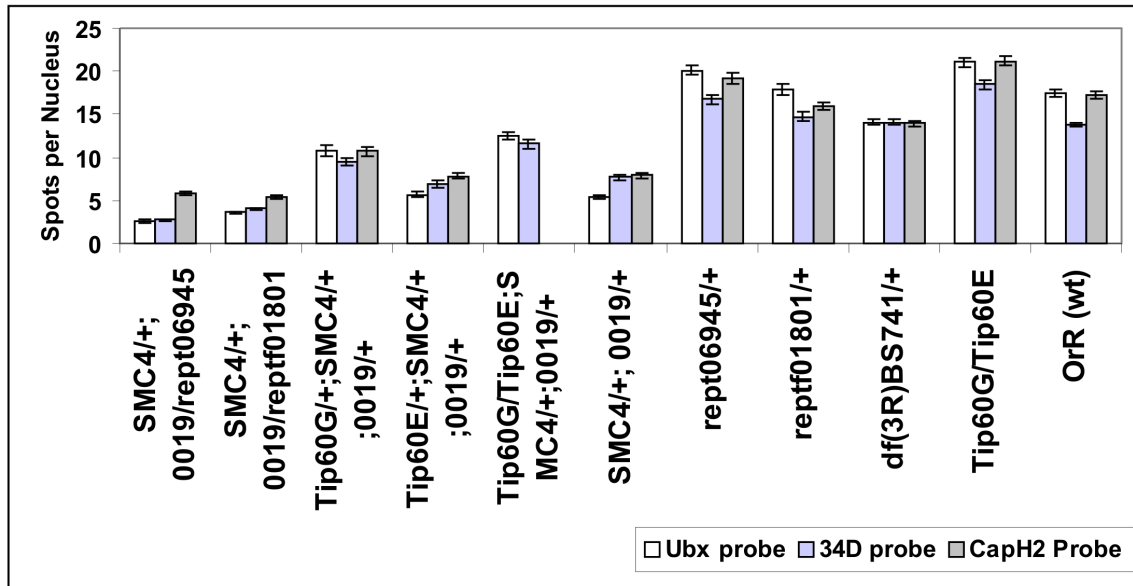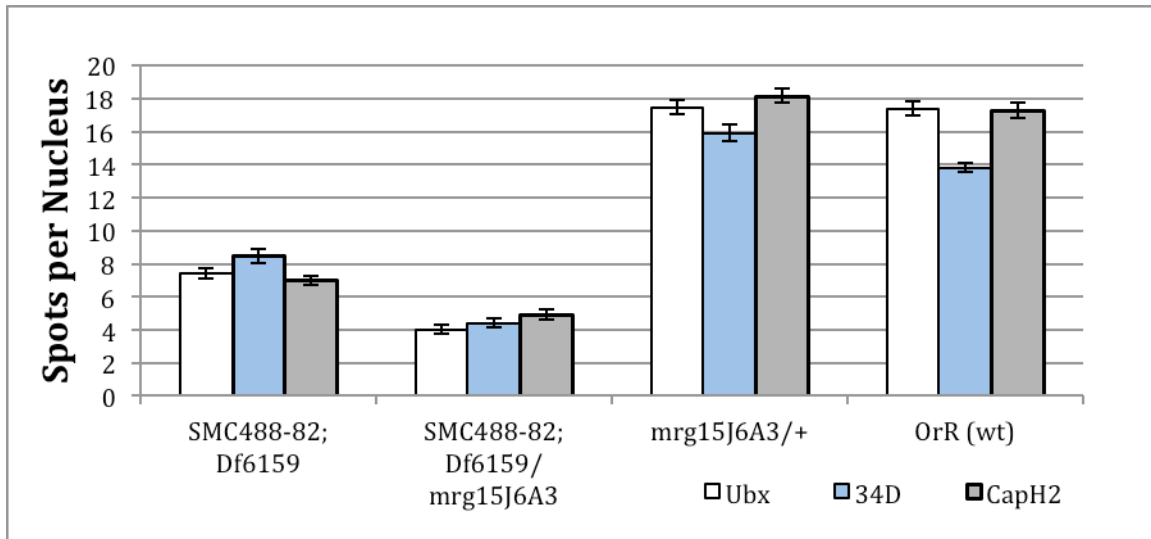

**FigureS2** Condensin II interactors in the ovarian nurse cells. The graphs shows the number of FISH spots per nucleus in stage 6/7 eggchambers for each of the genotypes listed on the x-axis. The white bar represents the Ubx genomic region FISH probe, light blue is the 34D genomic region FISH probe, and grey is the Cap-H2 genomic region FISH probe. 0019 denotes the allelic designations for *Cap-H2*<sup>Z3-0019</sup>. The *SMC4* allele used in the top graph is *Smc4*<sup>k08819</sup> and for the bottom graph *Smc4*<sup>88-82</sup>. The deficiency uncovering the *Mrg15* locus is Df(3R)BSC741. The deficiency uncovering the Cap-H2 locus is Df(3R)Exel6159 abbreviated as "Df6159". The list of complete genotypes is found in supplemental Table S2 along with the number of nurse cells for each probe and p-values.

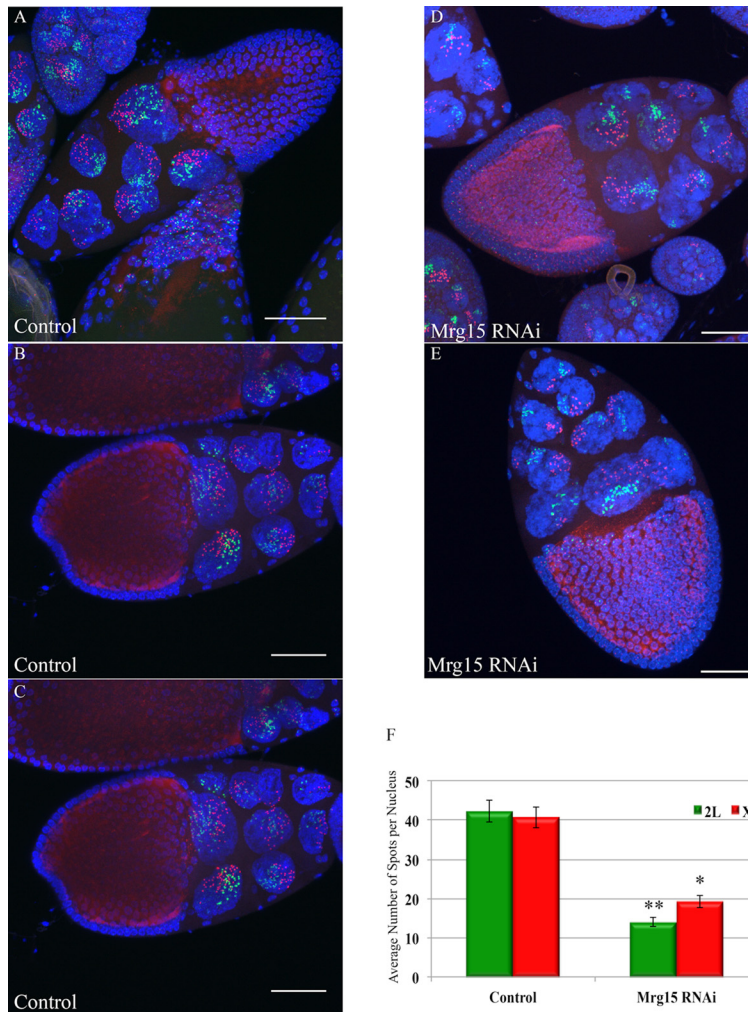

**FigureS3** Germline specific RNAi depletion of Mrg15 leads to polytene unpairing defects. DNA FISH probes to chromosome 2L (green spots) and X-chromosome (red spots) in representative stage 10 eggchambers (DAPI in blue). Note that the unpairing defect was too severe in earlier stages and thus made quantitation of individual spots difficult. Panels A-C are control *Mata4-GAL-VP16* and panels D-E are *Mata4-GAL-VP16, Mrg15-TRiP-GL00128* RNAi depleted tissues (see methods). Panel F, number of FISH spots per nucleus were counted manually in 3D images for 3 different stage 10 eggchambers, and average number of spots is shown with standard error of the mean (two-tailed T-test, assuming unequal variance was calculated using MS Excel  $*p < 10^{-6}$ ;  $**p < 10^{-8}$ ). For 2L-probes  $n=17$  (control) and  $n=18$  (Mrg15 RNAi) nuclei. For X-probes  $n=16$  (control) and  $n=16$  (Mrg15 RNAi) nuclei. Images acquired with a Nikon laser scanning confocal with a 40x oil immersion lens (see methods), and 2D projections of a limited number of z-optical sections are shown. Scale bars are 50 $\mu$ m in each panel. See Figure 6 of main text for higher magnification images of individual stage 10 nuclei with FISH signals.

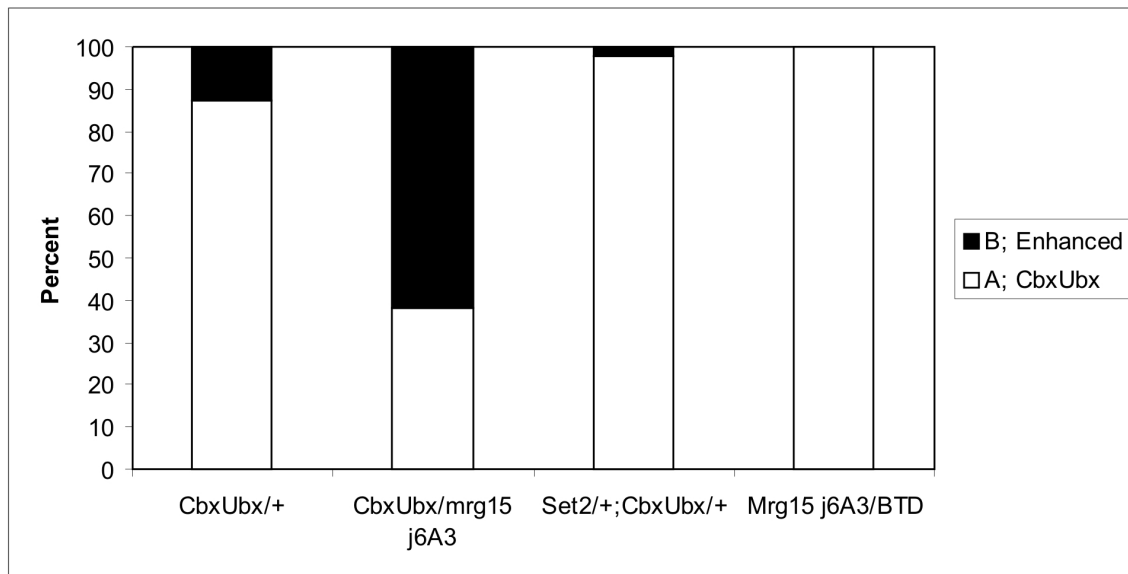

**FigureS4** Transvection in *Mrg15*. Wings from the genotypes shown on x-axis were scored as either typical *Ubx<sup>Cbx-1</sup>Ubx<sup>1</sup>* (class A, white bar) or enhanced (class B, black bar). Note that "typical" class A wings are not wild type and instead have a moderate abnormal morphology as a result of the transvecting *Ubx<sup>Cbx-1</sup>* allele. See Figure 7 of main text for images of typical wings. For simplicity, *Ubx<sup>Cbx-1</sup>Ubx<sup>1</sup>* is denoted above as "CbxUbx". The data presented in this Figure S4 for *Mrg15<sup>j6A3</sup>* was derived independently of the data in Figure 7 of the main text. As an additional control, the *Set2<sup>1</sup>/+* mutation has no significant effect on this transvection system. The last genotype includes the bithorax transvection disruptor (BTD), which is a rearrangement of the *Ubx<sup>Cbx-1</sup>Ubx<sup>1</sup>* chromosome. N>61 for all genotypes. P-values using chi-squared relative to *Ubx<sup>Cbx-1</sup>Ubx<sup>1</sup>/++* enhanced class: *Mrg15<sup>j6A3</sup>* p<0.001, *Set2<sup>1</sup>* p=0.74, *Mrg15<sup>j6A3</sup>/BTD* p<0.005. The *Set2<sup>1</sup>* mutation has no significant affect on transvection in this assay and serves as a negative control. Note that since only one *Set2* mutant allele was tested we cannot exclude the possibility that other *Set2* mutations may modify transvecting loci.

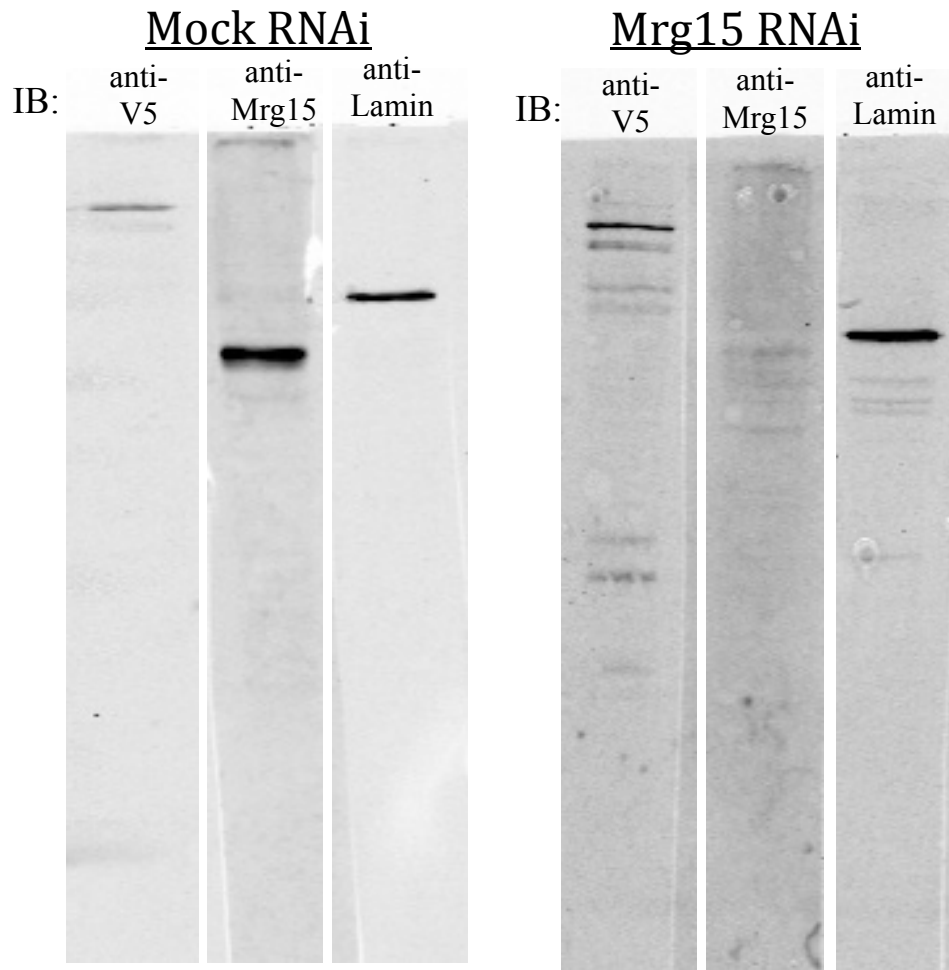

**Figure S5** RNAi depletion of Mrg15 protein in S2 cultured cells. Cells were transfected with pMT-Cap-H2-V5 (or Cap-H2-EGFP; only V5 shown here) and were treated with double stranded RNA to pBlueScript SK (control Mock RNAi) or to Mrg15. Whole cell lysates were used for immunoblots (IB) with anti-V5, anti-Mrg15 or anti-Lamin (Dm0, Lamin B). Approximately >75% of Mrg15 protein was observed to be consistently depleted over four biological replicates. Protein depletion was determined from immunoblots exposed to film, scanned and quantitated using ImageJ. Lamin Dm0 bands in the linear range were used as loading controls.

**Table S1 List of yeast two-hybrid interactors.** The list of clones recovered from the yeast two-hybrid screen. The insert size in base pairs was estimated from PCR products (see main text for methods). The gene descriptor and CG numbers are as given from [www.flybase.org](http://www.flybase.org) based on blast search results from sequenced clones.

| clone #   | size of insert | gene descriptor                                                                   | CG-identifier |
|-----------|----------------|-----------------------------------------------------------------------------------|---------------|
| 1CH2-64-1 | 1000           | unknown (eIF-3-p25 domain, Eukaryotic translation initiation factor 3 subunit 12) | CG10306       |
| 1CH2-39   | 500            | unknown (methyltransferase-like protein)                                          | CG10584       |
| 1CH2-65   | 400            | Programmed cell death 4 ortholog (Pdcd4)                                          | CG10990       |
| 1CH2-83-3 | 200            | RpS12                                                                             | CG11271       |
| 1CH2-76-3 | 250            | RpS12                                                                             | CG11271       |
| 1CH2-4    | 1100           | Mitochondrial ribosomal protein S22                                               | CG12261       |
| 1CH2-21   | 200            | Pleckstrin-like protein (PH domain-containing)                                    | CG12393       |
| 1CH2-32   | 300            | Ribosomal protein L8                                                              | CG1263        |
| 1CH2-54-1 | 900            | beta-site APP-cleaving enzyme                                                     | CG13095       |
| 1CH2-7-1  | 1000           | yellow-g2, yellow protein (contain MRJP domain)                                   | CG13804       |
| 1CH2-68   | 900            | Chorion protein a at 7F                                                           | CG33962       |
| 1CH2-83-1 | 900            | lethal (3) 03670 (unknown function)                                               | CG1715        |
| 1CH2-51-4 | 180            | RpL5                                                                              | CG17489       |
| 1CH2-14   | 360            | Glutathione S transferase E6                                                      | CG17530       |
| 1CH2-1    | 360            | Ribosomal protein L31                                                             | CG1821        |
| 1CH2-28   | 400            | Ribosomal protein S7                                                              | CG1883        |
| 1CH2-63-1 | 300            | RpS7                                                                              | CG1883        |
| 1CH2-61   | 800            | Translation elongation factor 2b (Ef2b)                                           | CG2238        |
| 1CH2-77   | 550            | Translation elongation factor 2b                                                  | CG2238        |
| 1CH2-2    | 1000           | Yolk protein 1                                                                    | CG2985        |
| 1CH2-73   | 1350           | Yolk protein 1 (Yp1)                                                              | CG2985        |
| 1CH2-78   | 120            | Yolk protein 1 (Yp1) (same as 1CH2-73)                                            | CG2985        |
| 1CH2-45-1 | 950            | Yolk protein 1                                                                    | CG2985        |
| 1CH2-67-1 | 880            | Yolk protein 1                                                                    | CG2985        |
| 1CH2-58   | 1300           | Yolk protein 1                                                                    | CG2985        |
| 1CH2-72-1 | 900            | Yolk protein 1                                                                    | CG2985        |
| 1CH2-45-2 | 300            | RpL41                                                                             | CG30425       |
| 1CH2-72-3 | 200            | RpL41                                                                             | CG30425       |
| 1CH2-64-2 | 800            | 14-3-3 epsilon (PAR5, EK3-5, 14-3-3)                                              | CG31196       |
| 1CH2-7-2  | 230            | RpL12                                                                             | CG3195        |
| 1CH2-17   | 360            | Pyroglutamyl-peptidase I                                                          | CG32147       |
| 1CH2-80   | 250            | singed, structural constituent of cytoskeleton                                    | CG32858       |
| 1CH2-79-1 | 780            | 26S proteasome regulatory complex subunit p42D (Rpt4)                             | CG3455        |
| 1CH2-53   | 900            | unknown (Xylutokinase activity, FGGY-N and FGGY -C domains)                       | CG3534        |
| 1CH2-60   | 900            | bellwether (blw), mitochondrial ATP synthase subunit alpha precursor              | CG3612        |
| 1CH2-74   | 700            | Mitochondrial ATP synthase alpha subunit                                          | CG3612        |
| 1CH2-34   | 600            | Ribosomal protein L23                                                             | CG3661        |
| 1CH2-19   | 450            | Eukaryotic initiation factor 4E (eIF-4E)                                          | CG4035        |
| 1CH2-54-2 | 500            | RpS16                                                                             | CG4046        |
| 1CH2-26   | 1000           | Unknown                                                                           | CG40460       |
| 1CH2-51-1 | 1150           | Unknown                                                                           | CG40460       |
| 1CH2-18   | 350            | Ribosomal protein L35 RpL35                                                       | CG4111        |
| 1CH2-69   | 300            | Eukaryotic initiation factor 2 (eIF-2 beta)                                       | CG4153        |
| 1CH2-59   | 410            | Heat shock protein hsp26                                                          | CG4183        |

---

|           |      |                                                           |        |
|-----------|------|-----------------------------------------------------------|--------|
| 1CH2-44   | 200  | SUMO/Ubiquitin-like protein SMT3                          | CG4494 |
| 1CH2-8-2  | 280  | RpLP2                                                     | CG4918 |
| 1CH2-67-2 | 600  | RpS2                                                      | CG5920 |
| 1CH2-37   | 650  | Vacuolar proton-motive ATPase subunit G VHA13             | CG6213 |
| 1CH2-41   | 800  | MRG15                                                     | CG6363 |
| 1CH2-56   | 1400 | MRG15                                                     | CG6363 |
| 1CH2-8-1  | 600  | MRG15                                                     | CG6363 |
| 1CH2-52-2 | 390  | Chorion protein 15                                        | CG6519 |
| 1CH2-27   | 130  | Chorion protein 19                                        | CG6524 |
| 1CH2-66   | 530  | Chorion protein 19                                        | CG6524 |
| 1CH2-51-2 | 310  | RpS25                                                     | CG6684 |
| 1CH2-51-3 | 280  | RpS25                                                     | CG6684 |
| 1CH2-42   | 340  | Unknown (Nuclear phosphoprotein p8)                       | CG6770 |
| 1CH2-72-2 | 500  | Unknown (Nuclear phosphoprotein p8)                       | CG6770 |
| 1CH2-40-2 | 270  | RpS3                                                      | CG6779 |
| 1CH2-5    | 600  | Rack1, Receptor of activated protein kinase C1            | CG7111 |
| 1CH2-15   | 400  | Rack1                                                     | CG7111 |
| 1CH2-24   | 600  | Rack1                                                     | CG7111 |
| 1CH2-49   | 600  | Rack1                                                     | CG7111 |
| 1CH2-71   | 550  | Rack1                                                     | CG7111 |
| 1CH2-40-1 | 450  | Rack1                                                     | CG7111 |
| 1CH2-79-2 | 420  | Rack1                                                     | CG7111 |
| 1CH2-36   | 300  | Ribosomal protein LP0(RpLP0)                              | CG7490 |
| 1CH2-50   | 400  | Ribosomal protein L11 (RpL11)                             | CG7726 |
| 1CH2-43   | 180  | janus A (molecular function unknown, sex differentiation) | CG7933 |
| 1CH2-13   | 510  | Unknown (WD40/YVTN repeat-like-containing domain)         | CG8001 |
| 1CH2-23   | 350  | Cystatin-like protein                                     | CG8050 |
| 1CH2-84   | 160  | Ribosomal protein L37A (RpL37A)                           | CG8527 |
| 1CH2-76-2 | 400  | Jon25Biii (elastase activity, trypsin activity)           | CG8871 |
| 1CH2-12   | 900  | Glyceraldehyde 3 phosphate dehydrogenase 2                | CG8893 |
| 1CH2-83-2 | 510  | Vitelline membrane 26Aa (Vm26Aa)                          | CG9048 |
| 1CH2-11   | 360  | palisade, TU-1 (vitelline membrane formation)             | CG9050 |
| 1CH2-25   | 250  | Vitelline membrane 34Ca (Vm34Ca)                          | CG9271 |
| 1CH2-30   | 900  | Glutathione S-transferase-like protein                    | CG9362 |
| 1CH2-52-1 | 500  | Glycoside hydrolase                                       | CG9466 |
| 1CH2-76-1 | 500  | Int6 (Translation initiation factor activity)             | CG9677 |
| 1CH2-57   | 200  | Unknown                                                   | CG9350 |
| 1CH2-29   | 60   | empty vector                                              |        |
| 1CH2-31   | 70   | empty vector                                              |        |
| 1CH2-81   | 40   | empty vector                                              |        |
| 1CH2-63-2 | 20   | empty vector                                              |        |

---

**Table S2 Figure S1 supporting information.** List of genes, stock numbers, number of glands (nuclei), and p-values for Figure S1. For stock number, BL=Bloomington, v=Vienna Drosophila RNAi Center. The p-value is a two-tailed student t-test in Microsoft Excel and relative to the Oregon-R (OrR-S).

| Gene      | Stock # | # glands (nuclei) | p-value to OrR          |
|-----------|---------|-------------------|-------------------------|
| OrR-S     | BL4269  | 29 (1876)         | NA                      |
| Cap-H2    | v24905  | 15 (1068)         | 1.14x 10 <sup>-28</sup> |
| Cap-D3    | v9402   | 11 (584)          | 1.91x 10 <sup>-23</sup> |
| SMC4      | v10937  | 14 (882)          | 8.02x 10 <sup>-14</sup> |
| Cap-G     | v40047  | 26 (1634)         | 4.20x 10 <sup>-11</sup> |
| Cap-H     | v26760  | 23 (1303)         | 1.55x 10 <sup>-7</sup>  |
| Cap-D2    | v33424  | 22 (1209)         | 1.01x 10 <sup>-4</sup>  |
| SMC1      | v6532   | 23 (1460)         | 1.12x 10 <sup>-2</sup>  |
| SMC3      | v39205  | 30 (1654)         | 3.42x 10 <sup>-7</sup>  |
| SMC5      | v38969  | 37 (1952)         | 1.67x 10 <sup>-6</sup>  |
| Polo      | v20177  | 27 (1429)         | 8.16x 10 <sup>-11</sup> |
| Trithorax | v37715  | 6 (369)           | 4.58x 10 <sup>-5</sup>  |
| E(z)      | v27646  | 5 (249)           | 0.27                    |
| Set2      | v30707  | 33 (1467)         | 1.54x 10 <sup>-12</sup> |
| Set2-GFP  | BL24108 | 11 (532)          | 1.21x 10 <sup>-9</sup>  |
| Tip60     | v22233  | 11 (554)          | 0.931                   |



**Table S3 Figure S2 supporting information.** “Abbr” denotes abbreviation of genotype used in supplemental Figure S2. List of genotypes, number (n) of nurse cells for each of the three FISH probes, and p-values for supplemental Figure S2. The *Smc4* allele is *SMC4<sup>k08819</sup>* and the *Cap-H2* allele is *Cap-H2<sup>Z3-0019</sup>*. The p-value is a two-tailed student T-test in Microsoft Excel and relative to the OrR-S. “nd” denotes not done.

| Abbr.   | Genotype                                              | T-test to Genotype | Cap-H2   |          |          |          |          |             |
|---------|-------------------------------------------------------|--------------------|----------|----------|----------|----------|----------|-------------|
|         |                                                       |                    | Ubx FISH | 34D FISH | FISH     | n of Ubx | n of 34D | n of Cap-H2 |
|         | SMC4/+;Cap-H2/reptin <sup>P</sup> {PZ}06945           | SMC4/+;Cap-H2/+    | 2.07E-15 | 1.88E-20 | 3.10E-07 | 125      | 37       | 115         |
|         | SMC4/+;Cap-H2/reptin <sup>P</sup> {Pbac{WH}f01801     |                    | 9.99E-08 | 2.66E-14 | 2.63E-08 | 77       | 59       | 63          |
|         | SMC4/+;Cap-H2/Mrg15 <sup>Δj6A3</sup>                  |                    | 1.58E-12 | 3.72E-08 | 3.92E-13 | 124      | 19       | 83          |
| Tip60G  | Tip60 <sup>ΔP</sup> {Mae-UAS.6.11}GG01739/+;          |                    |          |          |          |          |          |             |
|         | SMC4/+;Cap-H2/+                                       |                    | 2.13E-12 | 5.21E-03 | 1.80E-06 | 75       | 49       | 79          |
| Tip60E  | Tip60 <sup>ΔP</sup> {Pbac{RB}e02395/+;SMC4/+;Cap-H2/+ |                    | 4.01E-01 | 1.63E-01 | 8.37E-01 | 89       | 55       | 92          |
|         | Tip60G/Tip60E; SMC4/+; Cap-H2/+                       |                    | 7.01E-28 | 2.43E-09 | nd       | 89       | 81       | nd          |
|         | SMC4/+;Cap-H2/+                                       | OrR-S              | 9.36E-53 | 3.93E-26 | 1.34E-32 | 59       | 61       | 74          |
|         | reptin <sup>P</sup> {PZ}06945/+                       |                    | 1.64E-04 | 2.13E-05 | 1.28E-02 | 86       | 72       | 63          |
|         | reptin <sup>P</sup> {Pbac{WH}f01801/+                 |                    | 4.76E-01 | 1.64E-01 | 7.49E-02 | 63       | 48       | 68          |
| Mrg15Df | Df(3R)BSC741/+                                        |                    | 2.06E-08 | 5.51E-01 | 5.88E-08 | 63       | 59       | 58          |
|         | Tip60G/Tip60E                                         |                    | 3.49E-07 | 2.11E-10 | 1.46E-08 | 79       | 57       | 86          |
| wt      | OrR-S                                                 |                    |          |          |          | 101      | 86       | 82          |

**Table S4 Figure 10 supporting information.** Supporting data for Figure 10 and pair-wise three-dimensional distance of FISH probes in cultured Kc<sub>167</sub> cells. Treatment for RNAi depletion or Cap-H2 overexpression (OE), average distance in micrometers ( $\mu\text{m}$ ), number of nuclei measured (N), standard error of the mean (SEM) and two-tailed, unequal variance T-test p-values, versus (vs) control RNAi samples, are shown. X-chromosome probes X1 is at  $\sim 9.4\text{Mb}$ , X2 is at  $\sim 7.35\text{Mb}$  and X3 is at  $\sim 5.8\text{Mb}$ ). Second-Chromosome probes on the left arm (2L) are at  $\sim 10.3\text{Mb}$  and  $\sim 8.3\text{Mb}$ . All coordinates are taken from the *Drosophila melanogaster* genome version BDGP R5/dm3 (2006) using the UC Santa Cruz genome browser.

| Treatment                                               | Average Distance ( $\mu\text{m}$ ) | N (nuclei) | SEM  | P-value vs Control |
|---------------------------------------------------------|------------------------------------|------------|------|--------------------|
| <b>X1 vs X2 (<math>\sim 2.05\text{Mb}</math> apart)</b> |                                    |            |      |                    |
| Control RNAi                                            | 0.96                               | 66         | 0.04 |                    |
| Cap-H2 RNAi                                             | 1.17                               | 63         | 0.05 | 0.001              |
| Mrg15 RNAi                                              | 1.14                               | 54         | 0.06 | 0.009              |
| Cap-H2, Mrg15 (double) RNAi                             | 1.19                               | 27         | 0.09 | 0.020              |
| Cap-H2 (OE)                                             | 0.71                               | 23         | 0.05 | <0.001             |
| <b>X1 vs X3 (<math>\sim 3.6\text{Mb}</math> Apart)</b>  |                                    |            |      |                    |
| Control RNAi                                            | 1.08                               | 53         | 0.05 |                    |
| Cap-H2 RNAi                                             | 1.26                               | 58         | 0.06 | 0.019              |
| Mrg15 RNAi                                              | 1.24                               | 49         | 0.06 | 0.028              |
| Cap-H2, Mrg15 (double) RNAi                             | 1.49                               | 39         | 0.09 | <0.001             |
| Cap-H2 (OE)                                             | 0.67                               | 22         | 0.06 | <0.001             |
| <b>2L (<math>\sim 2\text{Mb}</math> apart)</b>          |                                    |            |      |                    |
| Control RNAi                                            | 0.81                               | 46         | 0.04 |                    |
| Cap-H2 RNAi                                             | 1.00                               | 49         | 0.05 | 0.005              |
| Mrg15 RNAi                                              | 1.06                               | 30         | 0.06 | 0.002              |
| Cap-H2, Mrg15 (double) RNAi                             | 1.32                               | 35         | 0.09 | <0.001             |
| Cap-H2 (OE)                                             | 0.65                               | 19         | 0.05 | 0.002              |
